# Supplementary material for: Tropospheric products of the second GOP European GNSS reprocessing (1996–2014)
Source: Copernicus journal article supplement (doi:10.5194/amt-10-3589-2017), 2017-09-29
Supplement: Supplementary file 1 [file amt-10-3589-2017-supplement.pdf]

Supplement of Atmos. Meas. Tech., 10, 3589–3607, 2017  
<https://doi.org/10.5194/amt-10-3589-2017-supplement>  
© Author(s) 2017. This work is distributed under  
the Creative Commons Attribution 3.0 License.

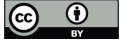

*Supplement of*

## **Tropospheric products of the second GOP European GNSS reprocessing (1996–2014)**

**Jan Dousa et al.**

*Correspondence to:* Jan Dousa ([jan.dousa@pecny.cz](mailto:jan.dousa@pecny.cz))

The copyright of individual parts of the supplement might differ from the CC BY 3.0 License.

ZTD trends for all GOP variants estimated for 172 EPN stations with time series over 10 years additionally indicating length of time series, number of available data and mean formal error of trend estimates.

| Station name | Number of observations | Time span in years | Trend [mm/yr] |        |        |        |        |        |        |                    |
|--------------|------------------------|--------------------|---------------|--------|--------|--------|--------|--------|--------|--------------------|
|              |                        |                    | GO0           | GO1    | GO2    | GO3    | GO4    | GO5    | GO6    | $\emptyset \sigma$ |
| AJAC         | 100752                 | 14                 | -0,056        | -0,079 | -0,093 | -0,090 | -0,202 | -0,196 | -0,189 | 0,0239             |
| ALAC         | 120365                 | 15                 | 0,197         | 0,190  | 0,201  | 0,226  | 0,241  | 0,259  | 0,254  | 0,0239             |
| ALME         | 110396                 | 14                 | 0,543         | 0,537  | 0,515  | 0,543  | 0,657  | 0,674  | 0,665  | 0,0274             |
| ANKR         | 126826                 | 18                 | 0,335         | 0,320  | 0,326  | 0,294  | 0,289  | 0,289  | 0,291  | 0,0132             |
| AQUI         | 118594                 | 15                 | 0,085         | 0,073  | 0,084  | 0,113  | 0,013  | 0,019  | 0,027  | 0,0191             |
| AXPV         | 85945                  | 12                 | -0,061        | -0,099 | -0,128 | -0,145 | -0,164 | -0,165 | -0,167 | 0,0396             |
| BBYS         | 80908                  | 11                 | -0,180        | -0,153 | -0,166 | -0,188 | -0,374 | -0,375 | -0,378 | 0,0347             |
| BELF         | 81371                  | 10                 | -0,820        | -0,937 | -0,868 | -0,891 | -0,982 | -0,982 | -0,987 | 0,0518             |
| BELL         | 129366                 | 16                 | 0,323         | 0,294  | 0,357  | 0,445  | 0,440  | 0,450  | 0,451  | 0,0195             |
| BOGI         | 96485                  | 13                 | 0,285         | 0,290  | 0,229  | 0,325  | 0,408  | 0,409  | 0,409  | 0,0315             |
| BOGO         | 146425                 | 18                 | 0,294         | 0,293  | 0,398  | 0,439  | 0,346  | 0,348  | 0,350  | 0,0176             |
| BOLG         | 75226                  | 10                 | -0,156        | -0,171 | -0,238 | -0,124 | -0,080 | -0,081 | -0,090 | 0,0462             |
| BOR1         | 149745                 | 18                 | 0,236         | 0,236  | 0,291  | 0,278  | 0,224  | 0,225  | 0,227  | 0,0171             |
| BRST         | 106389                 | 16                 | -0,196        | -0,217 | -0,179 | -0,105 | -0,183 | -0,178 | -0,180 | 0,0253             |
| BRUS         | 138542                 | 17                 | 0,184         | 0,174  | 0,205  | 0,189  | 0,107  | 0,109  | 0,108  | 0,0205             |
| BSCN         | 98544                  | 13                 | -0,072        | -0,100 | -0,088 | -0,112 | -0,063 | -0,060 | -0,058 | 0,0306             |
| BUCU         | 127709                 | 15                 | 0,205         | 0,216  | 0,253  | 0,307  | 0,338  | 0,337  | 0,334  | 0,0201             |
| BUDP         | 95787                  | 12                 | -0,110        | -0,162 | -0,151 | -0,179 | -0,149 | -0,149 | -0,156 | 0,0356             |
| BUTE         | 76537                  | 10                 | -0,533        | -0,505 | -0,512 | -0,356 | -0,053 | -0,057 | -0,076 | 0,0416             |
| BZRG         | 130485                 | 16                 | 0,377         | 0,342  | 0,348  | 0,314  | 0,354  | 0,361  | 0,364  | 0,0209             |
| CACE         | 105097                 | 13                 | -0,081        | -0,090 | -0,105 | -0,113 | -0,094 | -0,083 | -0,087 | 0,0282             |
| CAGL         | 147001                 | 18                 | 0,035         | 0,013  | 0,029  | 0,035  | -0,018 | -0,016 | -0,007 | 0,0166             |
| CAGZ         | 87840                  | 12                 | 0,256         | 0,234  | 0,248  | 0,248  | 0,174  | 0,172  | 0,173  | 0,0336             |
| CAME         | 59451                  | 10                 | -0,138        | -0,144 | -0,152 | -0,166 | -0,370 | -0,355 | -0,335 | 0,0424             |
| CANT         | 111288                 | 14                 | 0,455         | 0,443  | 0,519  | 0,651  | 0,720  | 0,729  | 0,728  | 0,0275             |
| CASC         | 133326                 | 17                 | -0,283        | -0,288 | -0,323 | -0,350 | -0,266 | -0,256 | -0,253 | 0,0229             |
| COMO         | 99475                  | 12                 | 0,131         | 0,081  | 0,060  | 0,019  | 0,025  | 0,027  | 0,026  | 0,0349             |
| CREI         | 88597                  | 11                 | -0,142        | -0,211 | -0,159 | -0,085 | -0,122 | -0,122 | -0,124 | 0,0398             |
| CREU         | 124575                 | 16                 | -0,014        | -0,043 | 0,024  | 0,099  | 0,178  | 0,187  | 0,192  | 0,0236             |
| DARE         | 114486                 | 14                 | -0,020        | -0,100 | -0,061 | -0,063 | -0,168 | -0,165 | -0,166 | 0,0292             |
| DELf         | 155934                 | 18                 | 0,065         | 0,047  | 0,071  | -0,004 | -0,142 | -0,140 | -0,139 | 0,0179             |
| DENT         | 153452                 | 18                 | -0,078        | -0,101 | -0,142 | -0,241 | -0,148 | -0,146 | -0,145 | 0,0182             |
| DOUR         | 151531                 | 18                 | -0,113        | -0,135 | -0,160 | -0,195 | -0,181 | -0,179 | -0,178 | 0,0173             |
| DRAG         | 96575                  | 14                 | 0,389         | 0,390  | 0,420  | 0,472  | 0,471  | 0,476  | 0,467  | 0,0249             |
| DRES         | 136053                 | 17                 | -0,134        | -0,143 | -0,062 | -0,122 | -0,338 | -0,335 | -0,334 | 0,0194             |
| DUBR         | 70354                  | 13                 | -0,168        | -0,182 | -0,202 | -0,241 | -0,305 | -0,299 | -0,283 | 0,0296             |

|      |        |    |        |        |        |        |        |        |        |        |
|------|--------|----|--------|--------|--------|--------|--------|--------|--------|--------|
| EBRE | 146859 | 18 | 0,143  | 0,118  | 0,108  | 0,114  | 0,120  | 0,124  | 0,128  | 0,0196 |
| EGLT | 99999  | 13 | -0,312 | -0,353 | -0,314 | -0,277 | -0,256 | -0,252 | -0,249 | 0,0293 |
| EIJS | 145433 | 18 | -0,200 | -0,224 | -0,241 | -0,301 | -0,442 | -0,440 | -0,440 | 0,0189 |
| ELBA | 88596  | 13 | 0,092  | 0,069  | 0,091  | 0,130  | 0,071  | 0,072  | 0,076  | 0,0318 |
| ENTZ | 77559  | 10 | -0,022 | -0,073 | 0,105  | 0,243  | 0,033  | 0,032  | 0,031  | 0,0464 |
| ESCO | 102986 | 15 | -0,124 | -0,136 | -0,111 | -0,092 | -0,079 | -0,072 | -0,068 | 0,0169 |
| EUSK | 134939 | 16 | -0,403 | -0,422 | -0,388 | -0,420 | -0,378 | -0,374 | -0,373 | 0,0209 |
| EVPA | 72161  | 10 | 0,355  | 0,389  | 0,327  | 0,464  | 0,509  | 0,505  | 0,510  | 0,0398 |
| GAIA | 115222 | 14 | 0,351  | 0,348  | 0,333  | 0,326  | 0,385  | 0,397  | 0,385  | 0,0264 |
| GANP | 87814  | 11 | 0,383  | 0,407  | 0,466  | 0,522  | 0,586  | 0,586  | 0,582  | 0,0328 |
| GENO | 129208 | 16 | 0,014  | -0,011 | -0,014 | 0,014  | -0,047 | -0,039 | -0,034 | 0,0232 |
| GLSV | 134009 | 16 | 0,557  | 0,578  | 0,532  | 0,488  | 0,586  | 0,585  | 0,584  | 0,0190 |
| GOPE | 153254 | 18 | -0,677 | -0,690 | -0,608 | -0,607 | -0,662 | -0,660 | -0,655 | 0,0152 |
| GRAS | 140582 | 18 | 0,020  | -0,007 | 0,009  | -0,011 | 0,021  | 0,024  | 0,027  | 0,0154 |
| GRAZ | 153049 | 18 | 0,268  | 0,250  | 0,306  | 0,323  | 0,195  | 0,199  | 0,204  | 0,0147 |
| GSR1 | 108580 | 13 | -0,001 | -0,026 | -0,036 | -0,068 | -0,048 | -0,041 | -0,036 | 0,0249 |
| GUIP | 89592  | 12 | -0,154 | -0,196 | -0,133 | -0,096 | -0,170 | -0,172 | -0,173 | 0,0394 |
| HELG | 120758 | 15 | -0,066 | -0,085 | -0,039 | -0,047 | -0,012 | -0,009 | -0,011 | 0,0255 |
| HERS | 143259 | 18 | 0,348  | 0,327  | 0,321  | 0,333  | 0,291  | 0,293  | 0,294  | 0,0197 |
| HERT | 92786  | 11 | -0,494 | -0,567 | -0,589 | -0,614 | -0,545 | -0,544 | -0,551 | 0,0393 |
| HFLK | 84520  | 12 | -0,086 | -0,091 | -0,101 | -0,113 | -0,349 | -0,347 | -0,335 | 0,0230 |
| HOBU | 139921 | 17 | -0,177 | -0,196 | -0,134 | -0,153 | -0,209 | -0,207 | -0,208 | 0,0200 |
| HOFN | 139038 | 17 | -0,300 | -0,320 | -0,364 | -0,495 | -0,662 | -0,662 | -0,658 | 0,0226 |
| CHIZ | 98135  | 14 | -0,337 | -0,364 | -0,408 | -0,351 | -0,368 | -0,360 | -0,361 | 0,0327 |
| IENG | 84450  | 11 | 0,272  | 0,256  | 0,262  | 0,238  | 0,233  | 0,232  | 0,228  | 0,0438 |
| ISTA | 109927 | 15 | 0,176  | 0,182  | 0,179  | 0,223  | 0,240  | 0,242  | 0,238  | 0,0218 |
| JOEN | 142645 | 18 | 0,507  | 0,520  | 0,548  | 0,556  | 0,463  | 0,466  | 0,466  | 0,0190 |
| JOZ2 | 87803  | 12 | -0,202 | -0,201 | -0,234 | -0,325 | -0,399 | -0,398 | -0,401 | 0,0345 |
| JOZE | 152569 | 18 | 0,162  | 0,156  | 0,226  | 0,208  | 0,184  | 0,186  | 0,191  | 0,0168 |
| KARL | 141152 | 17 | -0,268 | -0,297 | -0,278 | -0,281 | -0,334 | -0,330 | -0,331 | 0,0191 |
| KATO | 83566  | 11 | 0,512  | 0,538  | 0,520  | 0,546  | 0,641  | 0,642  | 0,636  | 0,0357 |
| KELY | 112053 | 18 | 0,113  | 0,123  | 0,092  | 0,045  | -0,039 | -0,037 | -0,037 | 0,0174 |
| KHAR | 78923  | 11 | 0,389  | 0,433  | 0,292  | 0,126  | 0,203  | 0,202  | 0,212  | 0,0363 |
| KIRO | 139392 | 18 | 0,136  | 0,128  | 0,138  | 0,149  | 0,108  | 0,110  | 0,109  | 0,0176 |
| KIRU | 146781 | 18 | 0,096  | 0,089  | 0,094  | 0,051  | 0,038  | 0,039  | 0,037  | 0,0171 |
| KLOP | 137550 | 17 | -0,308 | -0,328 | -0,255 | -0,383 | -0,488 | -0,485 | -0,486 | 0,0196 |
| KOSG | 127222 | 16 | 0,153  | 0,140  | 0,155  | 0,151  | 0,129  | 0,130  | 0,132  | 0,0218 |
| KRAW | 95292  | 11 | 0,318  | 0,313  | 0,333  | 0,322  | 0,321  | 0,321  | 0,317  | 0,0323 |
| LAGO | 110858 | 14 | -0,076 | -0,070 | -0,106 | -0,121 | -0,076 | -0,060 | -0,066 | 0,0271 |
| LAMA | 148192 | 18 | 0,297  | 0,288  | 0,343  | 0,338  | 0,243  | 0,245  | 0,247  | 0,0174 |
| LAMP | 113037 | 15 | 0,482  | 0,467  | 0,507  | 0,560  | 0,463  | 0,478  | 0,485  | 0,0215 |
| LINZ | 79274  | 13 | -0,219 | -0,240 | -0,290 | -0,342 | -0,375 | -0,368 | -0,356 | 0,0339 |
| LLIV | 122788 | 15 | -0,056 | -0,084 | -0,080 | -0,070 | -0,077 | -0,067 | -0,065 | 0,0184 |

|      |        |    |        |        |        |        |        |        |        |        |
|------|--------|----|--------|--------|--------|--------|--------|--------|--------|--------|
| LPAL | 107752 | 13 | 0,281  | 0,286  | 0,314  | 0,408  | 0,368  | 0,399  | 0,399  | 0,0201 |
| LROC | 101631 | 13 | -0,456 | -0,502 | -0,536 | -0,553 | -0,485 | -0,480 | -0,478 | 0,0338 |
| MOSE | 75578  | 10 | 0,152  | 0,129  | 0,225  | 0,279  | 0,116  | 0,107  | 0,092  | 0,0465 |
| MALA | 79455  | 13 | 0,092  | 0,092  | 0,060  | 0,084  | 0,141  | 0,156  | 0,159  | 0,0368 |
| MALL | 113036 | 14 | -0,015 | -0,024 | -0,130 | -0,195 | -0,034 | -0,021 | -0,019 | 0,0257 |
| MANS | 79838  | 11 | 0,572  | 0,608  | 0,632  | 0,733  | 0,508  | 0,517  | 0,518  | 0,0448 |
| MAR6 | 141781 | 18 | 0,320  | 0,320  | 0,316  | 0,281  | 0,308  | 0,309  | 0,307  | 0,0190 |
| MARS | 126624 | 16 | 0,320  | 0,300  | 0,299  | 0,326  | 0,247  | 0,255  | 0,260  | 0,0238 |
| MAS1 | 145566 | 18 | 0,145  | 0,144  | 0,141  | 0,102  | 0,146  | 0,153  | 0,158  | 0,0166 |
| MATE | 149857 | 18 | -0,029 | -0,038 | -0,028 | 0,020  | -0,047 | -0,045 | -0,039 | 0,0151 |
| MDOR | 9420   | 12 | 0,696  | 0,656  | 0,682  | 0,766  | 0,696  | 0,697  | 0,699  | 0,0340 |
| MDVJ | 9470   | 12 | 0,756  | 0,764  | 0,825  | 0,921  | 0,737  | 0,737  | 0,738  | 0,0336 |
| MEDI | 14875  | 18 | 0,015  | -0,005 | -0,029 | -0,055 | -0,057 | -0,053 | -0,048 | 0,0171 |
| METS | 14806  | 18 | 0,286  | 0,280  | 0,304  | 0,324  | 0,245  | 0,247  | 0,241  | 0,0180 |
| MIKL | 9984   | 12 | 0,288  | 0,335  | 0,371  | 0,402  | 0,375  | 0,375  | 0,375  | 0,0296 |
| MLVL | 11029  | 14 | -0,116 | -0,158 | -0,004 | 0,173  | 0,024  | 0,029  | 0,026  | 0,0272 |
| MOPI | 12376  | 16 | -0,293 | -0,289 | -0,194 | -0,174 | -0,332 | -0,326 | -0,330 | 0,0189 |
| MORP | 10699  | 18 | -0,421 | -0,460 | -0,448 | -0,417 | -0,403 | -0,402 | -0,402 | 0,0259 |
| MSEL | 7278   | 10 | 0,002  | -0,018 | -0,013 | 0,111  | 0,106  | 0,104  | 0,098  | 0,0469 |
| NEWL | 12099  | 16 | -0,108 | -0,119 | -0,107 | -0,091 | -0,051 | -0,046 | -0,045 | 0,0259 |
| NICO | 11856  | 17 | 0,082  | 0,063  | 0,076  | 0,155  | 0,188  | 0,191  | 0,189  | 0,0175 |
| NOT1 | 10935  | 14 | 0,115  | 0,095  | 0,131  | 0,165  | 0,024  | 0,034  | 0,040  | 0,0252 |
| NSSP | 6801   | 13 | 0,260  | 0,182  | 0,192  | 0,201  | 0,112  | 0,116  | 0,113  | 0,0280 |
| NYA1 | 13297  | 16 | 0,140  | 0,125  | 0,145  | 0,169  | 0,152  | 0,150  | 0,147  | 0,0169 |
| ONSA | 14807  | 18 | 0,200  | 0,190  | 0,211  | 0,214  | 0,156  | 0,158  | 0,158  | 0,0178 |
| ORID | 10693  | 14 | -0,093 | -0,119 | -0,084 | -0,054 | -0,115 | -0,110 | -0,102 | 0,0210 |
| OROS | 10291  | 13 | -0,290 | -0,265 | -0,291 | -0,357 | -0,364 | -0,363 | -0,360 | 0,0278 |
| OSJE | 8522   | 14 | -0,070 | -0,094 | -0,085 | -0,078 | -0,125 | -0,123 | -0,112 | 0,0271 |
| OSLS | 11174  | 14 | -0,043 | -0,086 | -0,040 | -0,019 | -0,084 | -0,082 | -0,080 | 0,0290 |
| PADO | 9266   | 13 | 0,358  | 0,318  | 0,329  | 0,328  | 0,274  | 0,279  | 0,277  | 0,0317 |
| PDEL | 11357  | 14 | -0,290 | -0,278 | -0,312 | -0,323 | -0,287 | -0,278 | -0,291 | 0,0302 |
| PENC | 15031  | 18 | 0,382  | 0,378  | 0,458  | 0,382  | 0,313  | 0,315  | 0,313  | 0,0158 |
| PFAN | 8862   | 11 | 0,759  | 0,765  | 0,762  | 0,707  | 0,218  | 0,224  | 0,243  | 0,0297 |
| POLV | 10709  | 13 | 0,694  | 0,730  | 0,816  | 0,934  | 0,721  | 0,720  | 0,717  | 0,0263 |
| POTS | 13545  | 18 | 0,346  | 0,329  | 0,333  | 0,310  | 0,279  | 0,280  | 0,290  | 0,0181 |
| PRAT | 11358  | 15 | 0,336  | 0,316  | 0,361  | 0,364  | 0,205  | 0,211  | 0,213  | 0,0253 |
| PTBB | 11822  | 14 | -0,085 | -0,103 | -0,082 | -0,137 | 0,056  | 0,060  | 0,061  | 0,0254 |
| PUYV | 7806   | 10 | 0,671  | 0,634  | 0,788  | 0,961  | 0,864  | 0,862  | 0,854  | 0,0418 |
| QAQ1 | 9820   | 12 | 0,421  | 0,423  | 0,412  | 0,398  | 0,473  | 0,478  | 0,481  | 0,0363 |
| RABT | 10962  | 14 | 0,190  | 0,188  | 0,143  | 0,135  | 0,162  | 0,185  | 0,196  | 0,0265 |
| RAMO | 12369  | 16 | 0,274  | 0,268  | 0,327  | 0,424  | 0,355  | 0,370  | 0,374  | 0,0144 |
| REDU | 9100   | 11 | -0,335 | -0,372 | -0,299 | -0,286 | -0,284 | -0,283 | -0,292 | 0,0370 |
| REYK | 14859  | 18 | 0,096  | 0,089  | 0,063  | 0,033  | 0,119  | 0,119  | 0,115  | 0,0203 |

|      |       |    |        |        |        |        |        |        |        |        |
|------|-------|----|--------|--------|--------|--------|--------|--------|--------|--------|
| RIGA | 14630 | 18 | 0,653  | 0,648  | 0,666  | 0,679  | 0,612  | 0,614  | 0,615  | 0,0186 |
| RIOJ | 5686  | 12 | 0,385  | 0,383  | 0,358  | 0,380  | 0,547  | 0,558  | 0,567  | 0,0535 |
| SASS | 9029  | 11 | 0,166  | 0,148  | 0,169  | 0,152  | 0,136  | 0,136  | 0,129  | 0,0373 |
| SBGZ | 6606  | 11 | -0,155 | -0,150 | -0,111 | -0,017 | 0,067  | 0,081  | 0,097  | 0,0358 |
| SCOR | 7680  | 10 | 0,440  | 0,433  | 0,403  | 0,379  | 0,419  | 0,421  | 0,415  | 0,0423 |
| SFER | 14056 | 18 | 0,100  | 0,085  | 0,050  | 0,035  | 0,106  | 0,113  | 0,114  | 0,0197 |
| SJDV | 12159 | 17 | 0,113  | 0,092  | 0,113  | 0,114  | 0,083  | 0,088  | 0,092  | 0,0195 |
| SKEO | 8215  | 11 | 0,045  | 0,019  | -0,016 | -0,038 | -0,031 | -0,030 | -0,028 | 0,0435 |
| SMID | 9212  | 11 | -0,161 | -0,197 | -0,185 | -0,215 | -0,215 | -0,215 | -0,222 | 0,0391 |
| SMNE | 11122 | 14 | -0,214 | -0,258 | -0,266 | -0,305 | -0,344 | -0,340 | -0,339 | 0,0282 |
| SODA | 13061 | 17 | 0,488  | 0,495  | 0,514  | 0,532  | 0,416  | 0,418  | 0,416  | 0,0195 |
| SOFI | 12111 | 17 | 0,170  | 0,157  | 0,180  | 0,245  | 0,057  | 0,061  | 0,079  | 0,0159 |
| SONS | 6388  | 13 | 0,230  | 0,219  | 0,177  | 0,144  | 0,355  | 0,369  | 0,374  | 0,0320 |
| SPTO | 9823  | 13 | -0,695 | -0,753 | -0,774 | -0,833 | -0,853 | -0,851 | -0,852 | 0,0316 |
| SRJV | 7599  | 15 | 0,074  | 0,075  | 0,086  | 0,103  | 0,079  | 0,084  | 0,091  | 0,0220 |
| STAS | 11227 | 14 | -0,100 | -0,140 | -0,125 | -0,160 | -0,157 | -0,155 | -0,153 | 0,0296 |
| SULD | 9212  | 11 | -0,541 | -0,586 | -0,626 | -0,633 | -0,493 | -0,493 | -0,500 | 0,0392 |
| SULP | 10153 | 13 | 0,350  | 0,371  | 0,355  | 0,400  | 0,371  | 0,369  | 0,371  | 0,0270 |
| SVTL | 7784  | 17 | 0,086  | 0,066  | 0,087  | 0,149  | 0,141  | 0,141  | 0,146  | 0,0470 |
| TERS | 14839 | 18 | -0,221 | -0,246 | -0,262 | -0,330 | -0,481 | -0,479 | -0,477 | 0,0192 |
| THU3 | 10017 | 12 | 0,417  | 0,427  | 0,418  | 0,415  | 0,391  | 0,391  | 0,391  | 0,0265 |
| TLMF | 8464  | 12 | -0,103 | -0,135 | -0,069 | -0,029 | -0,164 | -0,164 | -0,165 | 0,0351 |
| TLSE | 9998  | 13 | -0,029 | -0,062 | -0,120 | -0,096 | -0,098 | -0,092 | -0,091 | 0,0295 |
| TORI | 13574 | 17 | 0,165  | 0,129  | 0,143  | 0,168  | -0,033 | -0,030 | -0,028 | 0,0213 |
| TRDS | 11123 | 14 | 0,095  | 0,051  | 0,053  | 0,009  | 0,009  | 0,010  | 0,012  | 0,0279 |
| TRO1 | 13400 | 16 | 0,040  | 0,041  | 0,027  | 0,003  | -0,059 | -0,058 | -0,059 | 0,0204 |
| TUBI | 12289 | 15 | 0,360  | 0,370  | 0,390  | 0,420  | 0,356  | 0,358  | 0,355  | 0,0211 |
| TUBO | 10525 | 13 | -0,124 | -0,146 | -0,077 | -0,203 | 0,038  | 0,040  | 0,039  | 0,0273 |
| TUC2 | 7879  | 10 | -0,043 | -0,042 | 0,054  | 0,088  | -0,119 | -0,136 | -0,156 | 0,0373 |
| UNPG | 12468 | 16 | -0,186 | -0,199 | -0,170 | -0,197 | -0,271 | -0,265 | -0,255 | 0,0199 |
| UZHL | 10945 | 15 | 0,233  | 0,237  | 0,284  | 0,310  | 0,305  | 0,306  | 0,302  | 0,0244 |
| VAAS | 14060 | 18 | 0,445  | 0,447  | 0,468  | 0,484  | 0,433  | 0,435  | 0,436  | 0,0196 |
| VALE | 10139 | 14 | 0,218  | 0,198  | 0,225  | 0,273  | 0,363  | 0,377  | 0,371  | 0,0299 |
| VARS | 11202 | 14 | 0,011  | -0,008 | 0,005  | 0,004  | 0,031  | 0,031  | 0,031  | 0,0259 |
| VFCH | 9688  | 13 | -0,195 | -0,248 | -0,250 | -0,320 | -0,293 | -0,290 | -0,289 | 0,0328 |
| VIGO | 7256  | 13 | 0,551  | 0,552  | 0,543  | 0,533  | 0,597  | 0,600  | 0,603  | 0,0488 |
| VILO | 14096 | 18 | 0,220  | 0,223  | 0,239  | 0,240  | 0,211  | 0,212  | 0,212  | 0,0181 |
| VILL | 13954 | 18 | -0,278 | -0,286 | -0,304 | -0,340 | -0,285 | -0,285 | -0,277 | 0,0163 |
| VISO | 13923 | 18 | 0,254  | 0,253  | 0,270  | 0,284  | 0,206  | 0,209  | 0,209  | 0,0184 |
| VLNS | 8900  | 15 | 0,409  | 0,414  | 0,440  | 0,455  | 0,423  | 0,424  | 0,424  | 0,0336 |
| WARE | 15067 | 18 | -0,006 | -0,032 | -0,011 | -0,034 | -0,046 | -0,044 | -0,044 | 0,0176 |
| WARN | 9246  | 11 | 0,028  | -0,014 | -0,053 | -0,100 | 0,003  | 0,003  | -0,002 | 0,0363 |
| WROC | 13657 | 17 | -0,125 | -0,137 | -0,078 | -0,078 | -0,146 | -0,144 | -0,143 | 0,0186 |

|      |       |    |        |        |        |        |        |        |        |        |
|------|-------|----|--------|--------|--------|--------|--------|--------|--------|--------|
| WSRT | 14219 | 17 | -0,213 | -0,237 | -0,189 | -0,171 | -0,264 | -0,262 | -0,262 | 0,0202 |
| WTZR | 15458 | 18 | 0,270  | 0,252  | 0,340  | 0,377  | 0,209  | 0,211  | 0,212  | 0,0150 |
| YEBE | 11327 | 14 | 0,002  | -0,009 | -0,034 | -0,068 | -0,001 | 0,011  | 0,009  | 0,0228 |
| ZECK | 12463 | 17 | 0,411  | 0,384  | 0,434  | 0,496  | 0,419  | 0,418  | 0,418  | 0,0139 |
| ZIMM | 15466 | 18 | 0,091  | 0,058  | 0,072  | 0,099  | 0,010  | 0,012  | 0,018  | 0,0140 |
| ZOUF | 8958  | 11 | 0,249  | 0,222  | 0,217  | 0,165  | 0,138  | 0,139  | 0,136  | 0,0253 |
| ZYWI | 8089  | 11 | 0,638  | 0,663  | 0,741  | 0,796  | 0,721  | 0,721  | 0,715  | 0,0354 |
